# Supplementary material for: Nomograms based on clinicopathological factors and inflammatory indicators for prediction of early and late recurrence of hepatocellular carcinoma after surgical resection for patients with chronic hepatitis B
Source: PubMed Central journal article supplement — Ann Transl Med. 2021 Jan;9(1):12. doi: 10.21037/atm-20-1353 (PMC7859768; doi:10.21037/atm-20-1353), 2021-01
Supplement: atm-09-01-12-dss.pdf [file atm-09-01-12-dss.pdf]

## Data Sharing Statement

|                     |                                                                                                                                                    |                                                                                                   |
|---------------------|----------------------------------------------------------------------------------------------------------------------------------------------------|---------------------------------------------------------------------------------------------------|
| <b>Article Info</b> | <a href="http://dx.doi.org/10.21037/atm-20-1353">http://dx.doi.org/10.21037/atm-20-1353</a>                                                        |                                                                                                   |
| <b>Item</b>         | <b>Question</b>                                                                                                                                    | <b>Authors' Response<br/>(place "-" if not applicable)</b>                                        |
| 1                   | Would you like to share data collected for your study to others?                                                                                   | Yes.                                                                                              |
| 2                   | If not, would you like to share the reason for your decision?                                                                                      | -                                                                                                 |
| 3                   | What data in particular will be shared?                                                                                                            | All the relevant data presented in the article.                                                   |
| 4                   | Any other documents will be share? Such as study protocol, statistical analysis plan, informed consent form, clinical study report, analytic code. | No.                                                                                               |
| 5                   | When will data availability begin?                                                                                                                 | Anytime with the permission of the corresponding author and the ethics committee of our hospital. |
| 6                   | When will data availability end?                                                                                                                   | It depends.                                                                                       |
| 7                   | To whom will you share the data?                                                                                                                   | Clinical researchers.                                                                             |
| 8                   | For what type of analysis or purpose?                                                                                                              | Prognostic prediction, risk factors investigation, risk model construction, etc.                  |
| 9                   | How or where can the data/documents be obtained?                                                                                                   | Contact the corresponding author with the email.                                                  |
| 10                  | Any other restrictions?                                                                                                                            | The findings need to be shared and acknowledged.                                                  |
