# Supplementary material for: Nomograms based on clinicopathological factors and inflammatory indicators for prediction of early and late recurrence of hepatocellular carcinoma after surgical resection for patients with chronic hepatitis B
Source: PubMed Central journal article supplement — Ann Transl Med. 2021 Jan;9(1):12. doi: 10.21037/atm-20-1353 (PMC7859768; doi:10.21037/atm-20-1353), 2021-01
Supplement: atm-09-01-12-supplementary.pdf [file atm-09-01-12-supplementary.pdf]

**Table S1** The formulas of inflammation-related indexes

| Index   | Formula                                                                                                |
|---------|--------------------------------------------------------------------------------------------------------|
| NLR     | Neutrophil/lymphocyte                                                                                  |
| dNLR    | (white blood cell - lymphocyte)/lymphocyte                                                             |
| PLR     | Platelet/lymphocyte                                                                                    |
| LMR     | Pymphocyte/monocyte                                                                                    |
| GPR     | GGT/platelet ( $10^9/L$ )                                                                              |
| SII     | Platelet ( $10^9/L$ ) $\times$ neutrophil/lymphocyte                                                   |
| PNI     | Albumin + 5 $\times$ lymphocyte ( $10^9/L$ )                                                           |
| APRI    | AST (U/L)/platelet ( $10^9/L$ )                                                                        |
| ANRI    | AST (U/L)/neutrophil ( $10^9/L$ )                                                                      |
| ALRI    | AST (U/L)/lymphocyte ( $10^9/L$ )                                                                      |
| ALBI    | $0.66 \times \log_{10}(\text{bilirubin } (\mu\text{mol/L}) - 0.085 \times \text{albumin (g/L)})$       |
| FIB-4   | $[\text{age (yr)} \times \text{AST (U/L)}] / [\text{platelet } (10^9/L) \times \text{ALT(U/L)}^{1/2}]$ |
| S-index | $1000 \times \text{GGT} / [\text{platelet } (10^9/L) \times \text{albumin (g/L)}^2]$                   |

GGT: gamma-glutamyl transpeptidase; AST: aspartate transaminase; ALT: alanine transaminase; NLR: neutrophil-to-lymphocyte ratio; dNLR: derived neutrophil-to-lymphocyte ratio; PLR: platelet-to-lymphocyte ratio; LMR: lymphocyte-to-monocyte ratio; GPR: gamma-glutamyl transpeptidase-to-platelet ratio; SII: systemic immune-inflammation index; PNI: prognostic nutritional index; APRI: aspartate transaminase-to-platelet count ratio index; ANRI: aspartate transaminase-to-neutrophil ratio index; ALRI: aspartate transaminase-to-lymphocyte ratio index; ALBI: albumin-bilirubin; FIB-4: fibrosis index based on the four factors.

**Table S2** Different risk groups for overall, early, and late RFS according to the NomoScores

| NomoSore Groups | Range      | Cases (%)   | 1-year RFS | 2-year RFS | 3-year RFS | 5-year RFS |
|-----------------|------------|-------------|------------|------------|------------|------------|
| Overall RFS     |            |             |            |            |            |            |
| Low risk        | $\leq 125$ | 131 (34.2%) | 77.9%      | 64.8%      | 60.4%      | 53.6%      |
| Moderate risk   | 125–280    | 183 (47.8%) | 57.4%      | 8.9%       | 27.7%      | 22.2%      |
| High risk       | $> 280$    | 69 (18.0%)  | 29.9%      | 12.0%      | 6.0%       | 2.0%       |
| Early RFS       |            |             |            |            |            |            |
| Low risk        | $\leq 222$ | 209 (54.6%) | 71.6%      | 57.4%      |            |            |
| Moderate risk   | 222–320    | 101 (26.4%) | 54.6%      | 34.6%      |            |            |
| High risk       | $> 320$    | 73 (19.0%)  | 31.0%      | 12.2%      |            |            |
| Late RFS        |            |             |            |            |            |            |
| Low risk        | $\leq 100$ | 98 (88.3%)  |            |            | 88.0%      | 77.2%      |
| High risk       | $> 100$    | 13 (11.7%)  |            |            | 34.2%      | 0.0%       |

RFS: recurrence-free survival.

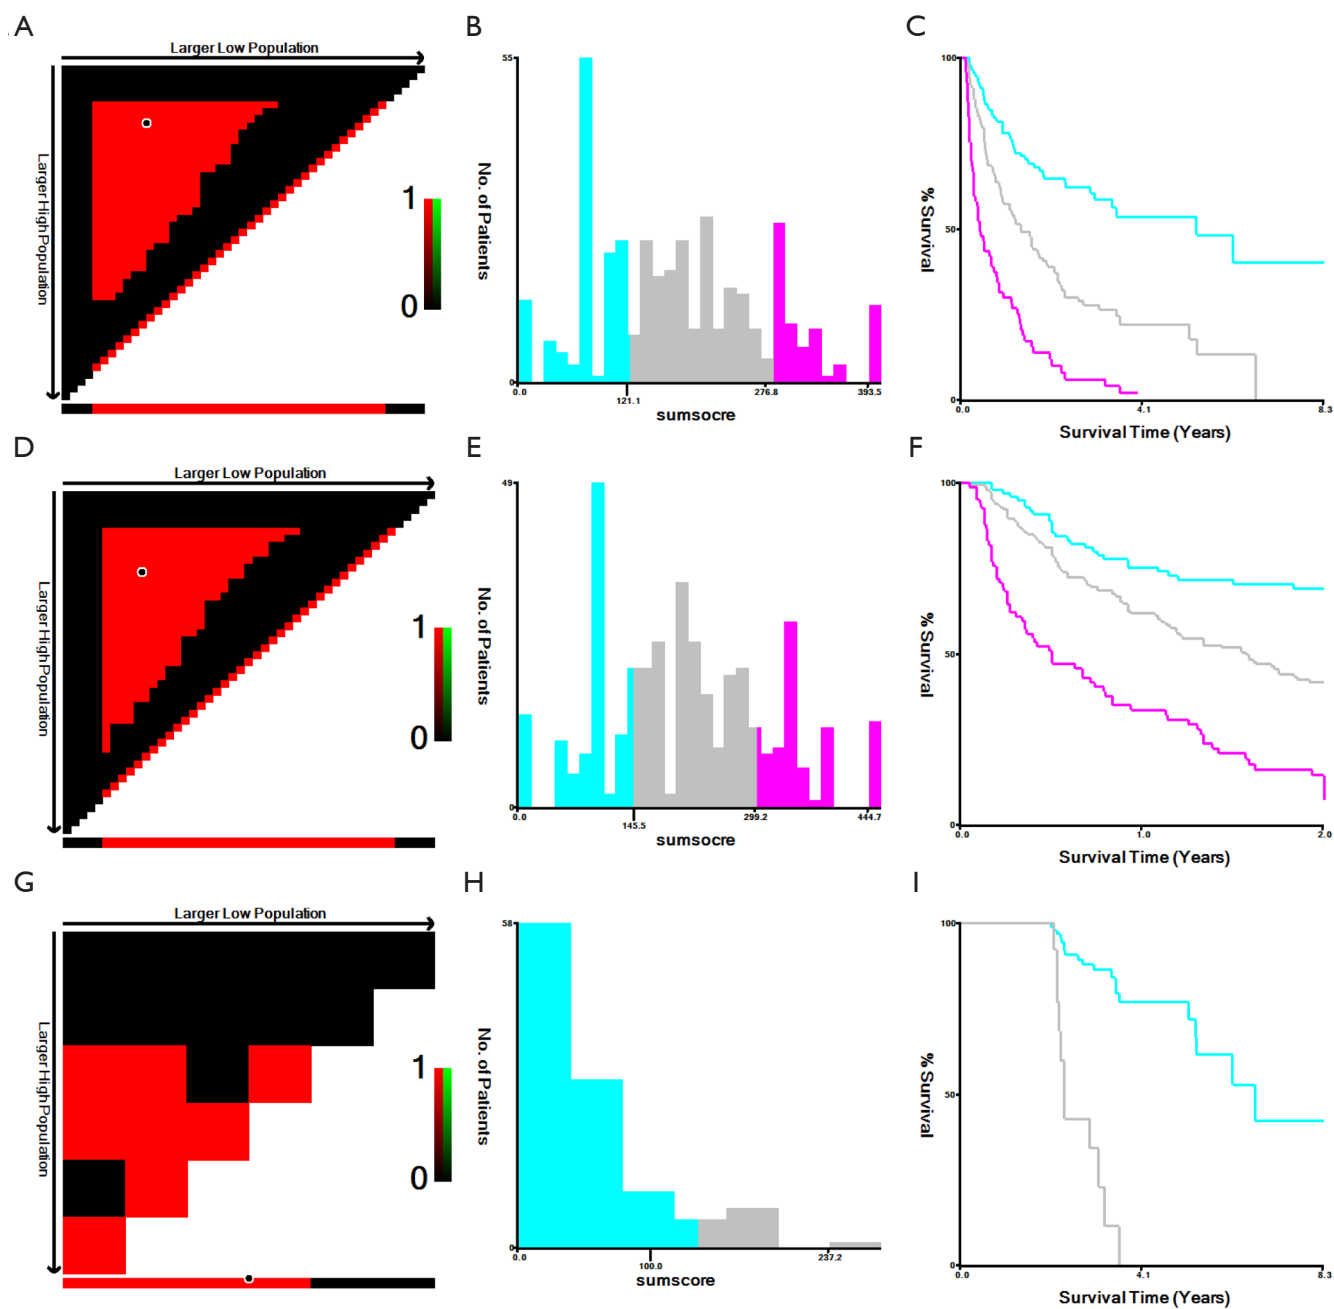

**Figure S1** The cut-off point identification of the NomoScores for overall (A, B, and C), early (D, E, and F), and late (G, H, and I) RFS produced by X-tile plots. RFS: recurrence-free survival.
